# Supplementary material
Source: PubMed Central journal article supplement (PMC2777094)

## SUPPLEMENTAL MATERIALS

### Membrane Insertion of the Pleckstrin Homology Domain Variable Loop 1 is Critical for Dynamin-catalyzed Vesicle Scission.

**Supplementary Figure 1.** Transferrin uptake was followed in tTA-HeLa cells infected for 16-18 hours with recombinant adenovirus encoding Dyn1 WT (●), RCLDyn1 G532C (▼), RCLDyn1 M534C (▽) or Dyn1 I533C (◆). The kinetics of internalization is plotted as a percentage of maximum uptake by Dyn1 WT.

**Supplementary Figure 2.** Basal GTPase activities (open symbols) of 0.5  $\mu$ M Dyn1 WT (○) and RCLDyn1 I533C (□) at physiological salt (20 mM HEPES, pH 7.5, 150 mM KCl) and cooperative, assembly-stimulated GTP activities of the same (closed symbols ● for Dyn 1 WT and ■ for RCL Dyn1 I533C) at low ionic strength (20 mM HEPES, pH 7.5, No KCl) were measured as described under Methods. The concentration of  $P_i$  released is plotted as a function of time.

**Supplementary Figure 3.** (A) Liposome-stimulated GTPase activities at increasing concentrations of Dyn1 WT (●) and Dyn1 I533A (■). The rate of GTP hydrolysis in  $\mu$ M  $P_i$  released/min is plotted as a function of Dyn1 concentration. (B) Membrane fission activities of increasing concentrations of Dyn1 WT (●) and Dyn1 I533A (■) was determined on SUPER templates (6  $\mu$ M total lipid) in the constant presence of GTP (1 mM) by a sedimentation assay as in Figure 1D.

**Supplementary Figure 4.** (A) Fluorescence images of RhPE-labeled SUPER templates showing the effect of addition of either 0.5  $\mu\text{M}$  (final) Dyn1 I533C in the absence of GTP. Contrast inverted image of the same is shown for clarity. Images were acquired at a focal plane close to the coverslip. Note the absence of optically visible membrane tubules for Dyn1 I533C in comparison to Dyn 1 WT (Figure 3A *top panel*). (B) Fluorescence images of RhPE-labeled SUPER templates containing glycerol flow-generated membrane tubules showing the effect of addition of 0.5  $\mu\text{M}$  (final) Dyn1 I533C in the constant presence of GTP. No fission of tubules into independent vesicles is observed when compared to Dyn1 WT (Figure 3B *bottom panel*). *Inset* Magnified fluorescence image of flow-generated membrane tubules showing no visible membrane constrictions for Dyn1 I533C. (C) Time-lapse fluorescence images showing the effect of addition of either 0.5  $\mu\text{M}$  Dyn1 I533C to membrane tethers pulled out of RhPE-labeled SUPER templates in the presence of GTP.

**Supplementary Movie 1.** Effect of 0.5  $\mu\text{M}$  (final) Dyn1 WT and Dyn 1 I533A addition to SUPER templates in the presence of GTP (1 mM) is shown. Frames were captured at 1 fps and played at 7 fps.

**Supplementary Movie 2.** Effect of 0.5  $\mu\text{M}$  (final) Dyn1 WT and Dyn 1 I533A addition to membrane tethers drawn out of SUPER templates in the presence of GTP (1 mM) is shown. Frames were captured at 1 fps and played at 7 fps.

# Supplementary Figure 1

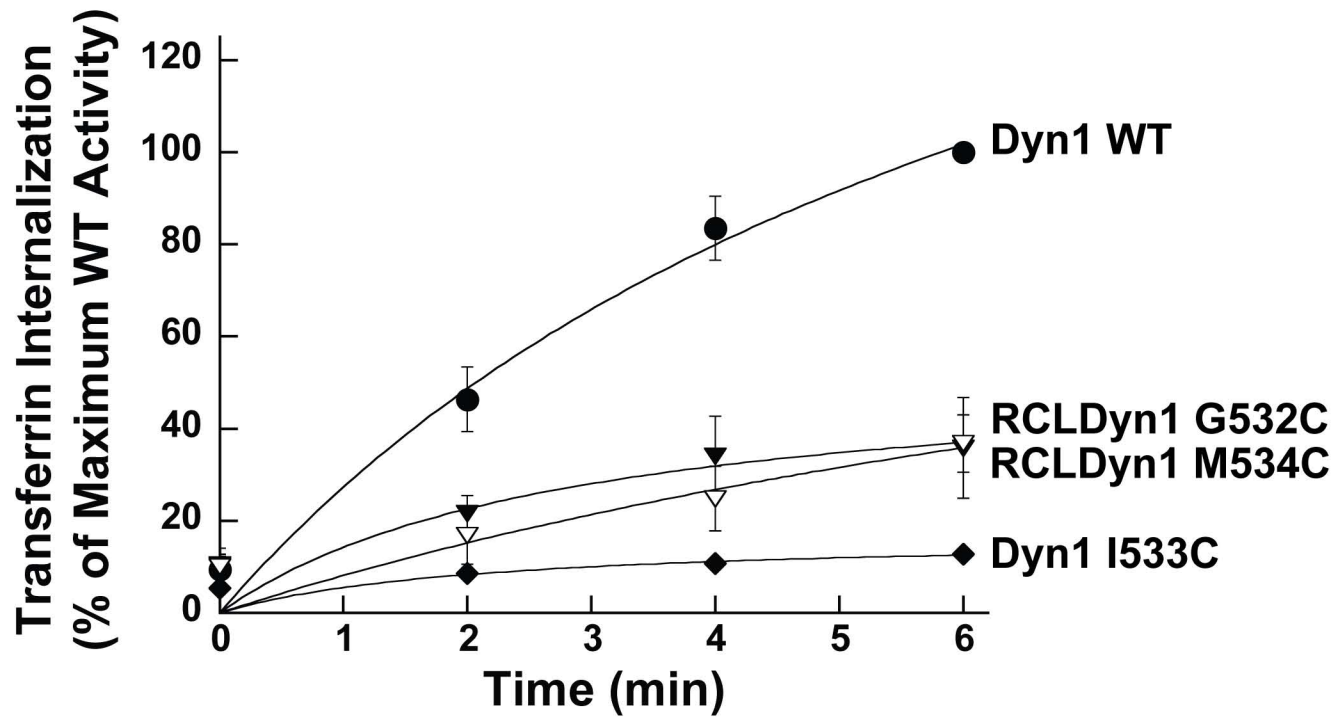

# Supplementary Figure 2

Basal and Assembly-stimulated GTPase Activities

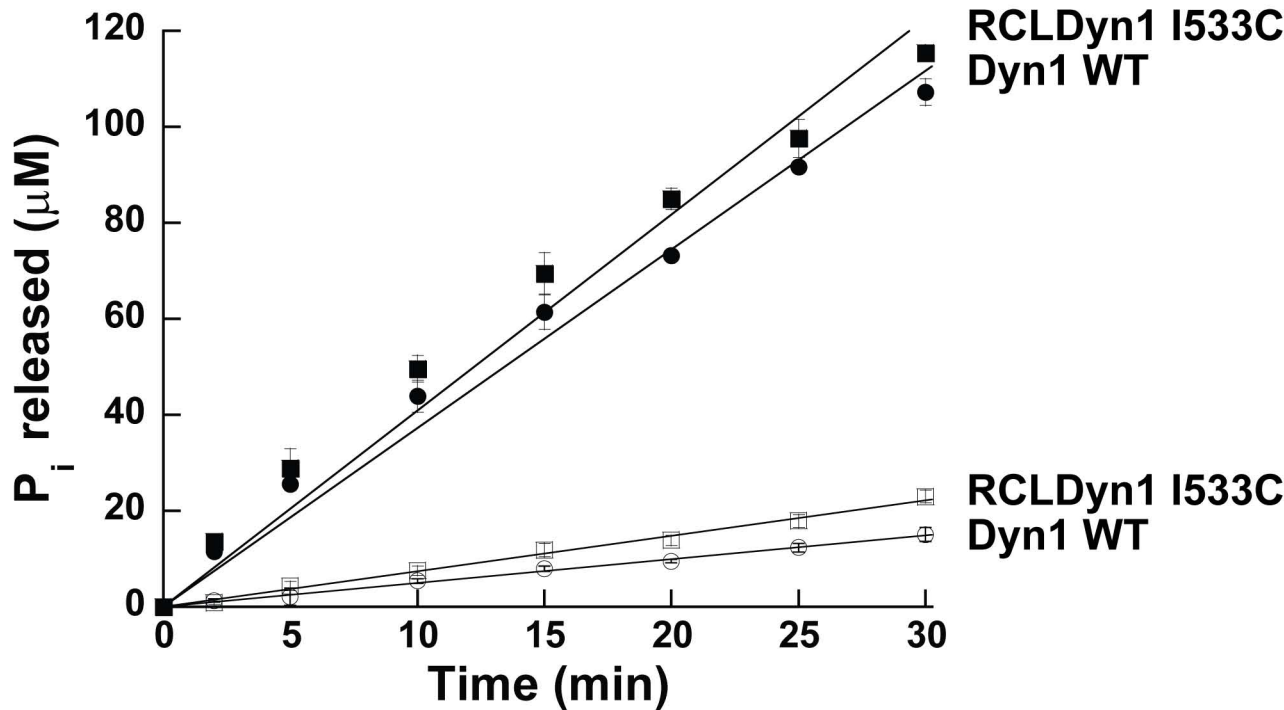

# Supplementary Figure 3

## A

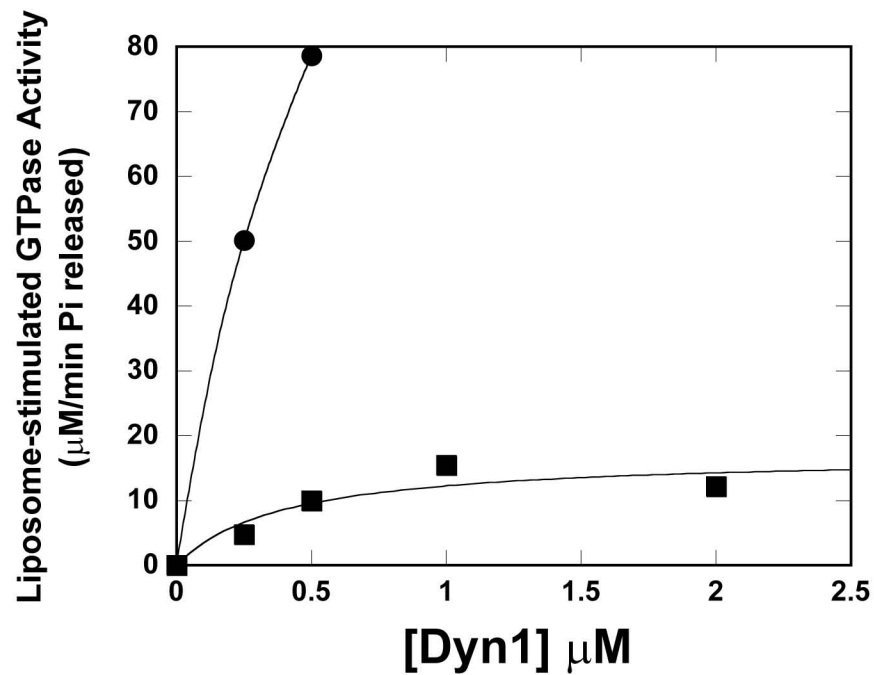

## B

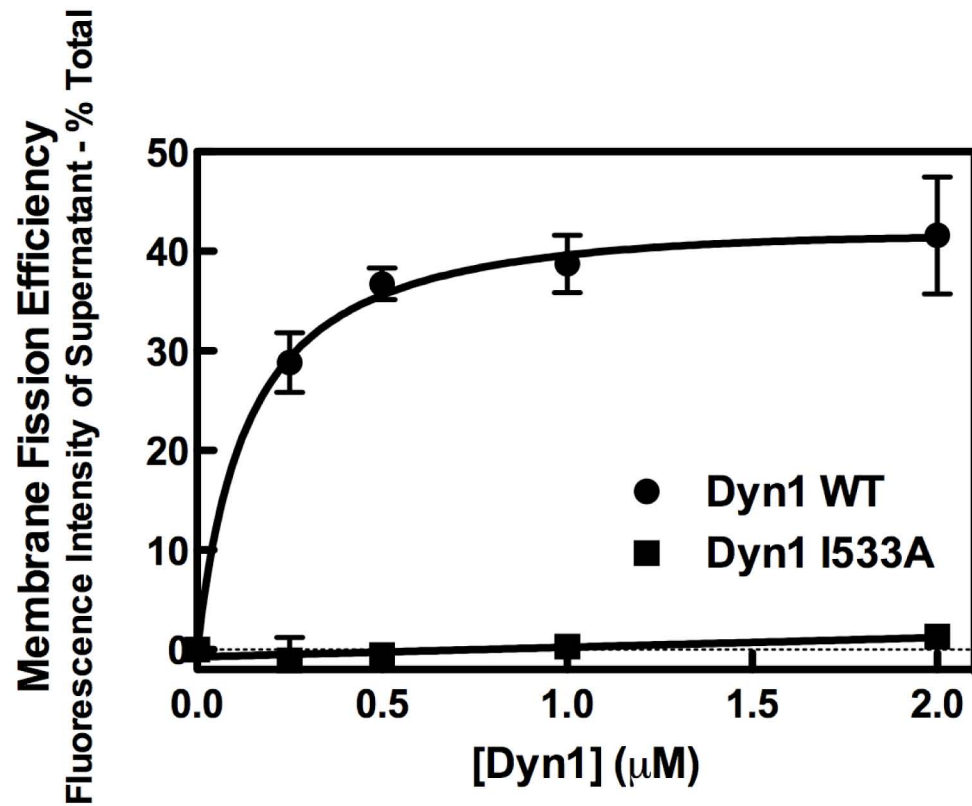

# Supplementary Figure 4

## A No Membrane Tubulation in the Absence of GTP

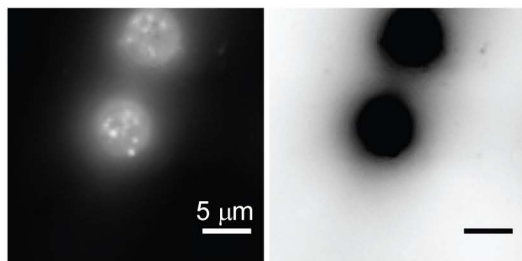

## B No Membrane Fission in the Presence of GTP

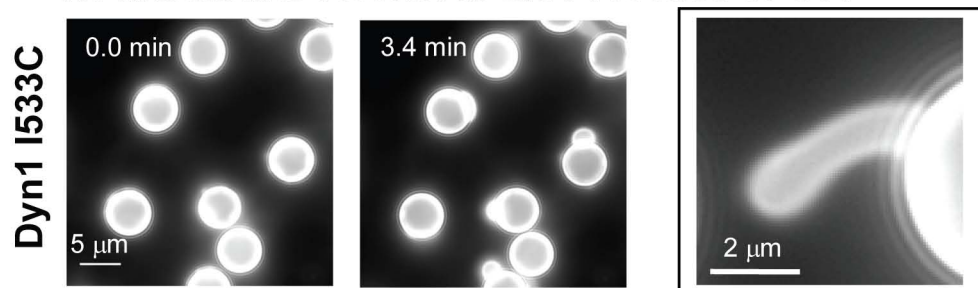

## C Fission of Membrane Tubes in the Presence of GTP

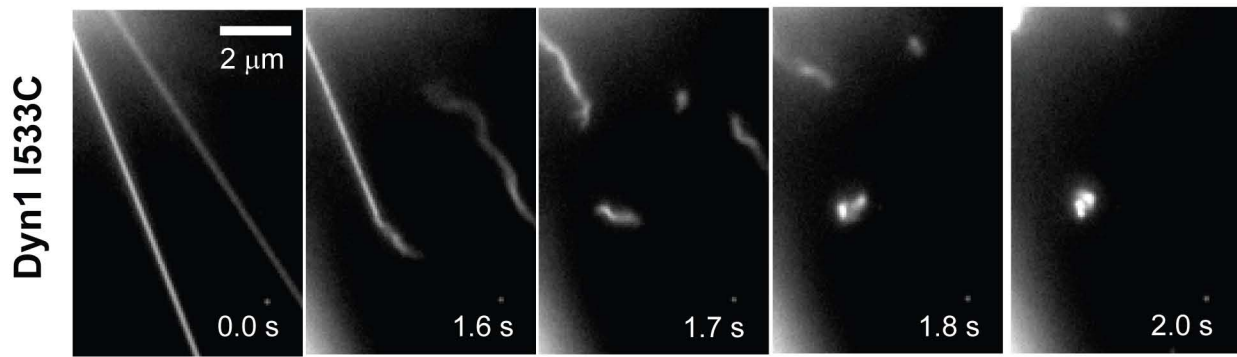

Supplement: E09-08-0683_1.pdf [file E09-08-0683_1.pdf]
